# Supplementary material for: Hydrothermal synthesis of blue-emitting silicon quantum dots for fluorescent detection of hypochlorite in tap water
Source: Royal Society of Chemistry journal article supplement (doi:10.1039/c5ay03325j), 2016-01-01
Supplement: c5ay03325j1.pdf [file c5ay03325j1.pdf]

## Electronic Supplementary Information

### **Hydrothermal Synthesis of Blue-Emitting Silicon Quantum Dots for Fluorescent Detection of Hypochlorite in Tap Water**

Yongming Guo\*, Lianfeng Zhang, Fengpu Cao, Lianghong Mang,  
Xiaoling Lei, Shengjuan Cheng, Jintong Song

College of Chemistry and Pharmaceutical Engineering, Nanyang Normal  
University, Nanyang 473061, China

Corresponding author: Yongming Guo, [chinahenangm@163.com](mailto:chinahenangm@163.com)

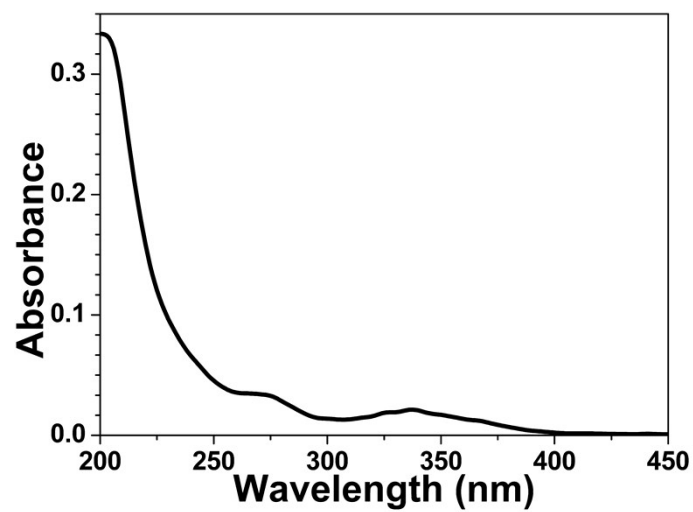

**Fig. S1** UV-vis absorption spectrum of SiQDs.

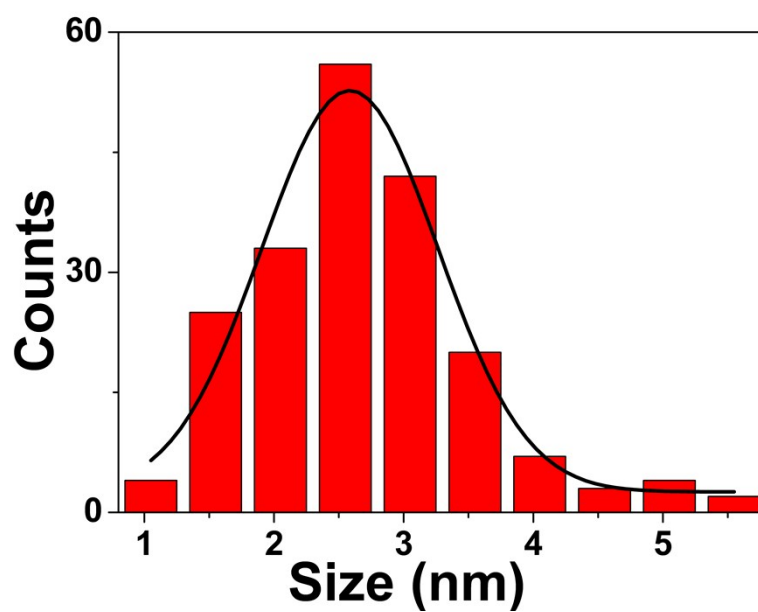

**Fig. S2** The size distribution analysis of SiQDs based on TEM images.

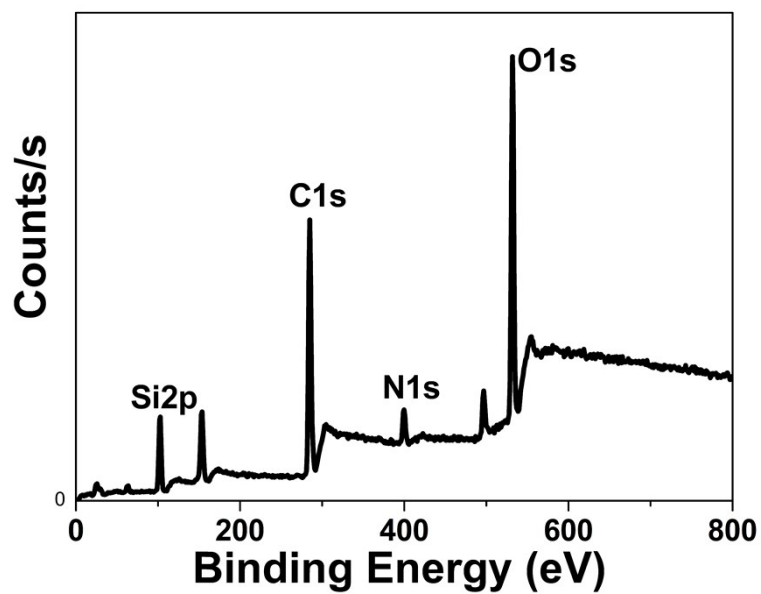

Fig. S3 XPS spectrum of SiQDs.

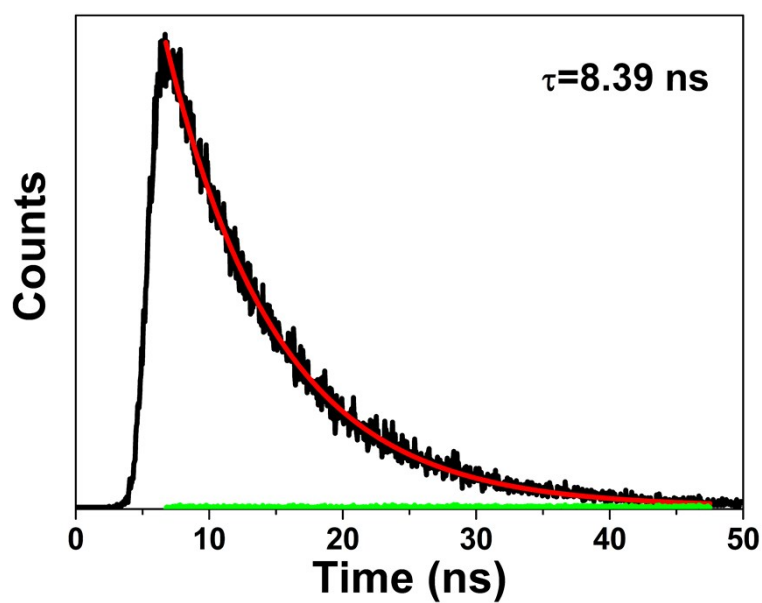

Fig. S4 Fluorescence lifetime test of SiQDs (The excitation wavelength is 345 nm, and the emission wavelength is 440 nm.).

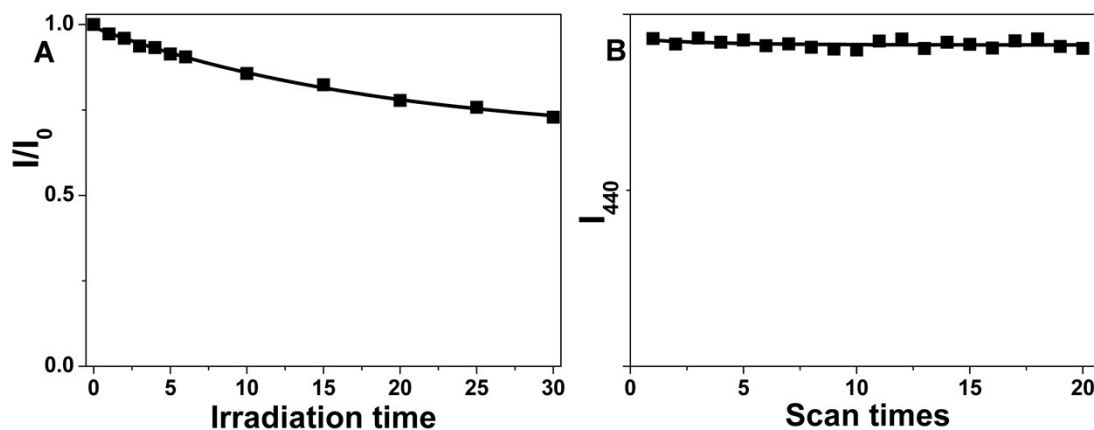

**Fig. S5** (A) The plot of  $I/I_0$  of SiQDs versus the irradiation time of the light at 365 nm,  $I_0$  and  $I$  is the fluorescence intensity of SiQDs at the irradiation time of 0 min and other time, respectively. (B) The plot of  $I_{440}$  of SiQDs versus the scan times (performed in pH 8.0, 50 mM sodium phosphate buffer; excitation wavelength is 345 nm.).

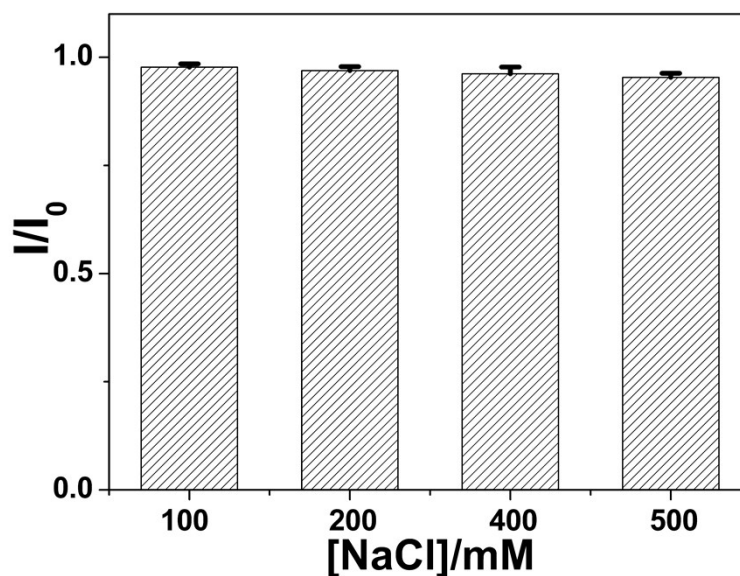

**Fig. S6** The relative fluorescence intensity ( $I/I_0$ ) of SiQDs versus the concentration of NaCl (performed in pH 8.0, 50 mM sodium phosphate buffer;  $I_0$  and  $I$  are the fluorescence intensity of SiQDs in the absence and presence of NaCl; excitation wavelength is 345 nm.).

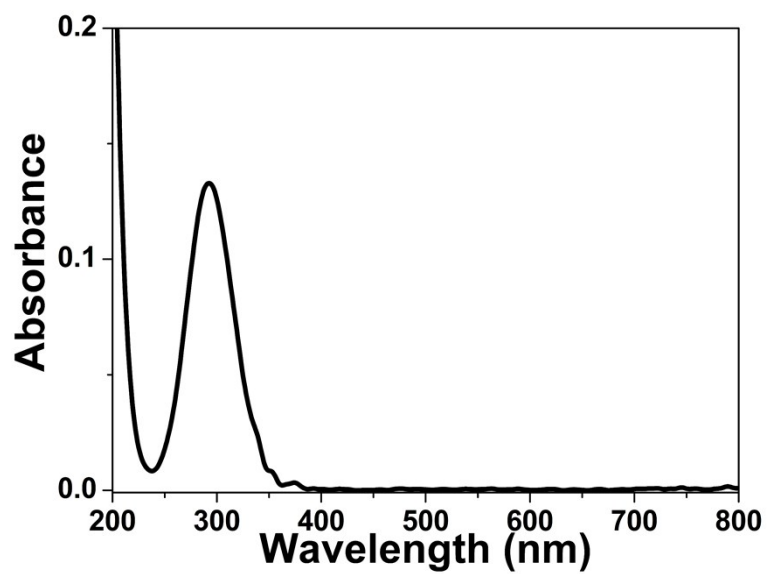

**Fig. S7** UV-vis absorption spectrum of  $\text{ClO}^-$ .

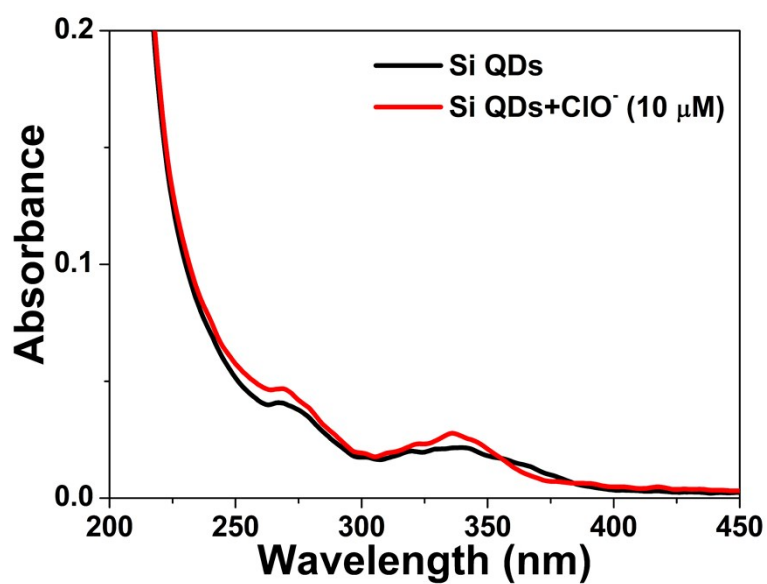

**Fig. S8** UV-vis absorption spectra of SiQDs in the absence and presence of  $\text{ClO}^-$  (performed in pH 8.0, 50 mM sodium phosphate buffer; the concentration of  $\text{ClO}^-$  is 10  $\mu\text{M}$ ).

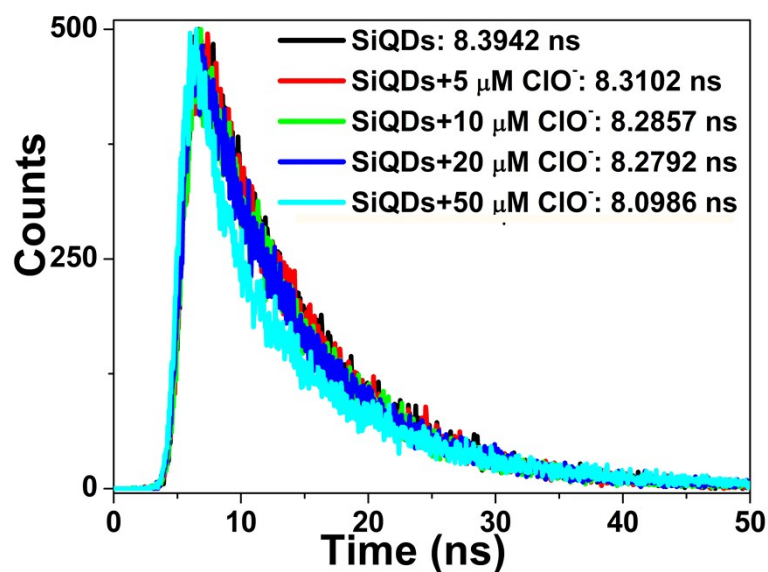

**Fig. S9** Fluorescence lifetime experiments of SiQDs in the absence and presence of  $\text{ClO}^-$ .

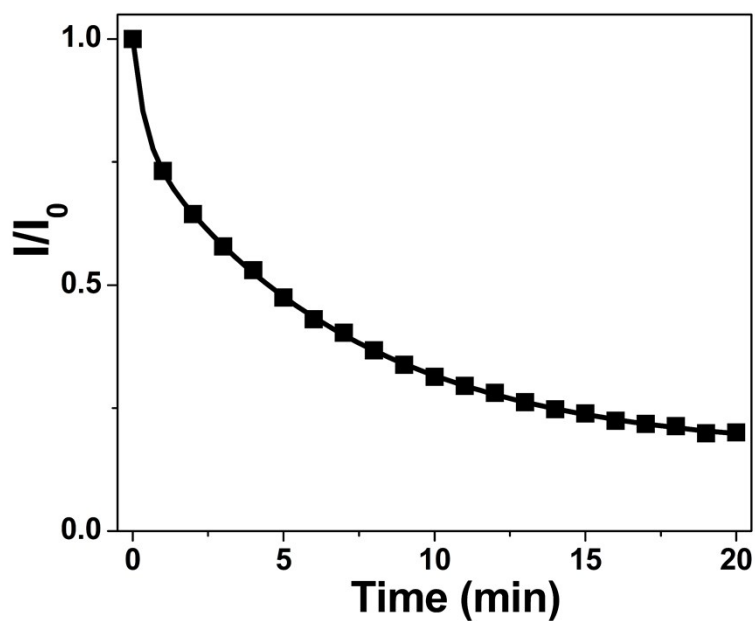

**Fig. S10** The plot of  $I/I_0$  of SiQDs versus the incubation time (performed in pH 8.0, 50 mM sodium phosphate buffer;  $I_0$  and  $I$  are the fluorescence intensity of SiQDs at 440 nm in the absence and presence of 10  $\mu\text{M}$   $\text{ClO}^-$ ; excitation wavelength is 345 nm.).

**Table S1.** Comparison of the proposed method with other various methods for the determination of hypochlorite.

| Method            | Materials                                        | Linear range           | Detection limit | References |
|-------------------|--------------------------------------------------|------------------------|-----------------|------------|
| Electrochemistry  | Polymelamine-modified carbon electrode           | 10 $\mu$ M-7 mM        | 5.5 $\mu$ M     | 1          |
| Chemiluminescence | Graphene quantum dots                            | 0.5 $\mu$ M-1 mM       | 0.3 $\mu$ M     | 2          |
| Colorimetric      | Gold nanoparticles/11-mercaptoundecanoic acid    | Not mentioned          | 0.5 $\mu$ M     | 3          |
| Colorimetric      | 3,3',5,5'-tetramethyl benzidine                  | 0-75 $\mu$ M           | 0.05 $\mu$ M    | 4          |
| Fluorescence      | 2-amino-3-(pyren-1-ylmethyleneamino)maleonitrile | Not mentioned          | 2.83 $\mu$ M    | 5          |
| Fluorescence      | Carbon dots/rhodamine B                          | 10 $\mu$ M-140 $\mu$ M | 4 $\mu$ M       | 6          |
| Fluorescence      | Silicon quantum dots                             | 0.01-7.5 $\mu$ M       | 0.01 $\mu$ M    | This work  |

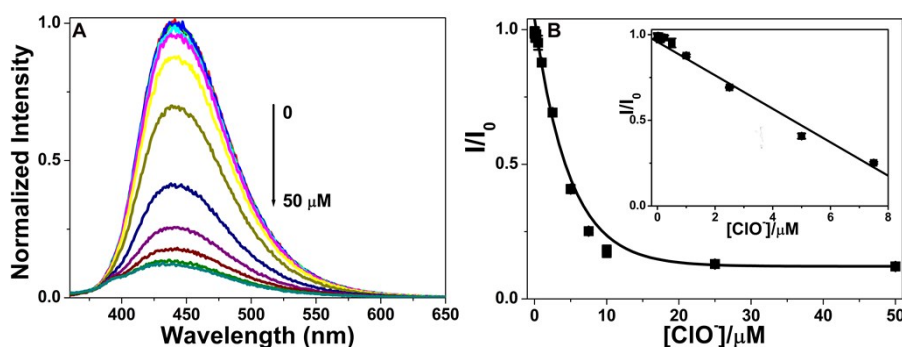

**Fig. S11** (A) Fluorescence spectra of SiQDs in the presence of different concentration of  $\text{ClO}^-$  in tap water. (B) The plot of  $I/I_0$  versus the concentration of  $\text{ClO}^-$  in tap water, the inset is the linear section of the plot (performed in pH 8.0, 50 mM sodium phosphate buffer;  $I_0$  and  $I$  correspond to the fluorescence intensity of SiQDs at 440 nm in the absence and presence of tap water, respectively; excitation wavelength is 345 nm.).

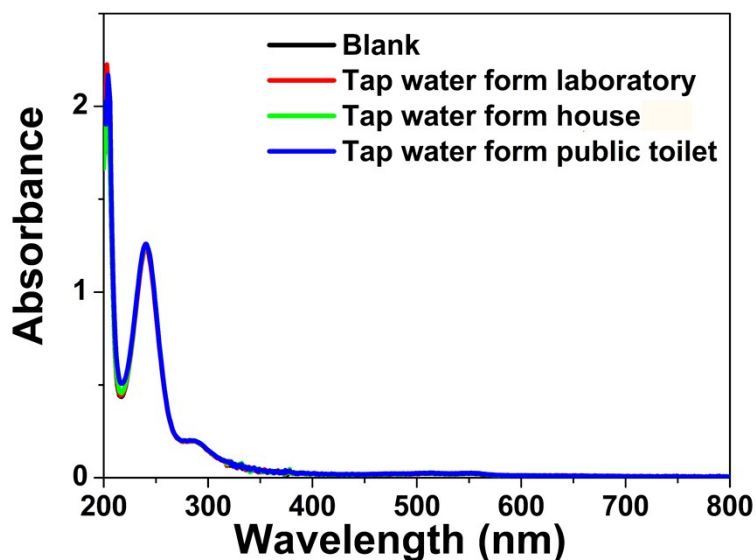

**Fig. S12** UV-vis absorption of N,N-Diethyl-*p*-phenylenediamine in the absence and presence of tap water from laboratory, the house and public toilet.

**Table S2.** Analysis of  $\text{ClO}^-$  in water samples with SiQDs.

| Samples     | Added ( $\mu\text{M}$ ) | Found ( $\mu\text{M}$ ) | Recovery (%) | RSD (% , n=4) |
|-------------|-------------------------|-------------------------|--------------|---------------|
| Tap water 1 | 0                       | -                       | -            | -             |
|             | 0.50                    | 0.43                    | 86           | 3.5           |
|             | 1.00                    | 1.04                    | 104          | 7.3           |
| Tap water 2 | 0                       | -                       | -            | -             |
|             | 0.50                    | 0.53                    | 106          | 8.6           |
|             | 1.00                    | 1.09                    | 109          | 8.8           |
| Tap water 3 | 0                       | -                       | -            | -             |
|             | 0.50                    | 0.41                    | 82           | 7.3           |
|             | 1.00                    | 1.03                    | 103          | 1.4           |

## References

1. K. Senthilkumar and J.-M. Zen, *Electrochem. Commun.*, 2014, **46**, 87-90.
2. T. Hallaj, M. Amjadi, Jamshid L. Manzoori and R. Shokri, *Microchim. Acta*, 2015, **182**, 789-796.
3. J. Zhang, X. Wang and X. Yang, *Analyst*, 2012, **137**, 2806-2812.



4. Y. Guo, Q. Ma, F. Cao, Q. Zhao and X. Ji, *Anal. Methods*, 2015, **7**, 4055-4058.
5. Y. Yang, C.-Y. Gao, J. Chen, N. Zhang and D. Dong, *Anal. Methods*, 2016, **8**, 805-809.
6. Y. Ding, J. Ling, J. Cai, S. Wang, X. Li, M. Yang, L. Zha and J. Yan, *Anal. Methods*, 2016, **8**, DOI: 10.1039/C1035AY03143E.
